# Supplementary material for: Species-Specific Analysis of Bacterial Vaginosis-Associated Bacteria
Source: PubMed Central journal article supplement (PMC10434177; doi:10.1128/spectrum.04676-22), 2023-06-22
Supplement: spectrum.04676-22-s0001.pdf [file spectrum.04676-22-s0001.pdf]

|               |                                                                                             |
|---------------|---------------------------------------------------------------------------------------------|
| Job Title     | BVAB-1_AY724739.1 Uncultured bacterium clone...                                             |
| RID           | <a href="#">PNJ0X2UG016</a> Search expires on 11-10 04:20 am <a href="#">Download All</a> ▾ |
| Program       | BLASTN <a href="#">?</a> <a href="#">Citation</a> ▾                                         |
| Database      | nt <a href="#">See details</a> ▾                                                            |
| Query ID      | lcl Query_40607                                                                             |
| Description   | BVAB-1_AY724739.1 Uncultured bacterium clone 123-f 57 ...                                   |
| Molecule type | dna                                                                                         |
| Query Length  | 1007                                                                                        |
| Other reports | <a href="#">Distance tree of results</a> <a href="#">MSA viewer</a> <a href="#">?</a>       |

### Filter Results

**Organism** *only top 20 will appear*  exclude

Type common name, binomial, taxid or group name

[+ Add organism](#)

**Percent Identity**  to  **E value**  to  **Query Coverage**  to

[Filter](#) [Reset](#)

- Descriptions
- Graphic Summary
- Alignments
- Taxonomy

### Sequences producing significant alignments

Download ▾ Select columns ▾ Show  [?](#)

select all 100 sequences selected

[GenBank](#) [Graphics](#) [Distance tree of results](#) [MSA Viewer](#)

|                                     | Description                                                                                      | Scientific Name                               | Max Score | Total Score | Query Cover | E value | Per. Ident | Acc. Len | Accession                  |
|-------------------------------------|--------------------------------------------------------------------------------------------------|-----------------------------------------------|-----------|-------------|-------------|---------|------------|----------|----------------------------|
| <input checked="" type="checkbox"/> | <a href="#">Clostridiales genomosp. BVAB1 isolate UAB071 chromosome, complete genome</a>         | <a href="#">Clostridiales genomosp. BVAB1</a> | 1860      | 7431        | 100%        | 0.0     | 100.00%    | 1649642  | <a href="#">CP049781.1</a> |
| <input checked="" type="checkbox"/> | <a href="#">Uncultured bacterium clone ncd1853a08c1 16S ribosomal RNA gene, partial sequence</a> | <a href="#">uncultured bacterium</a>          | 1860      | 1860        | 100%        | 0.0     | 100.00%    | 1352     | <a href="#">JF160899.1</a> |
| <input checked="" type="checkbox"/> | <a href="#">Uncultured bacterium clone nbu405d06c1 16S ribosomal RNA gene, partial sequence</a>  | <a href="#">uncultured bacterium</a>          | 1860      | 1860        | 100%        | 0.0     | 100.00%    | 1352     | <a href="#">GQ037632.1</a> |
| <input checked="" type="checkbox"/> | <a href="#">Uncultured bacterium clone 123-f 57 16S ribosomal RNA gene, partial sequence</a>     | <a href="#">uncultured bacterium</a>          | 1860      | 1860        | 100%        | 0.0     | 100.00%    | 1007     | <a href="#">AY724739.1</a> |
| <input checked="" type="checkbox"/> | <a href="#">Uncultured bacterium clone rRNA296 16S ribosomal RNA gene, partial sequence</a>      | <a href="#">uncultured bacterium</a>          | 1860      | 1860        | 100%        | 0.0     | 100.00%    | 1507     | <a href="#">AY959069.1</a> |
| <input checked="" type="checkbox"/> | <a href="#">Uncultured bacterium clone nck189a08c1 16S ribosomal RNA gene, partial sequence</a>  | <a href="#">uncultured bacterium</a>          | 1855      | 1855        | 100%        | 0.0     | 99.90%     | 1352     | <a href="#">KF094234.1</a> |
| <input checked="" type="checkbox"/> | <a href="#">Uncultured bacterium clone 23.001-2 16S ribosomal RNA gene, partial sequence</a>     | <a href="#">uncultured bacterium</a>          | 1855      | 1855        | 100%        | 0.0     | 99.90%     | 1377     | <a href="#">JX871285.1</a> |
| <input checked="" type="checkbox"/> | <a href="#">Uncultured bacterium clone 22.001-2 16S ribosomal RNA gene, partial sequence</a>     | <a href="#">uncultured bacterium</a>          | 1855      | 1855        | 100%        | 0.0     | 99.90%     | 1377     | <a href="#">JX871284.1</a> |
| <input checked="" type="checkbox"/> | <a href="#">Uncultured bacterium clone ncd1854c08c1 16S ribosomal RNA gene, partial sequence</a> | <a href="#">uncultured bacterium</a>          | 1855      | 1855        | 100%        | 0.0     | 99.90%     | 1352     | <a href="#">JF159358.1</a> |
| <input checked="" type="checkbox"/> | <a href="#">Uncultured bacterium clone nbw1010h11c1 16S ribosomal RNA gene, partial sequence</a> | <a href="#">uncultured bacterium</a>          | 1855      | 1855        | 100%        | 0.0     | 99.90%     | 1352     | <a href="#">GQ047285.1</a> |
| <input checked="" type="checkbox"/> | <a href="#">Uncultured bacterium clone nbu405e02c1 16S ribosomal RNA gene, partial sequence</a>  | <a href="#">uncultured bacterium</a>          | 1855      | 1855        | 100%        | 0.0     | 99.90%     | 1352     | <a href="#">GQ037635.1</a> |

**Supplemental file 1.1: BLAST alignment analysis of BVAB-1**

[Download](#) [GenBank](#) [Graphics](#) Sort by:

### Clostridiales genomsp. BVAB1 isolate UAB071 chromosome, complete genome

Sequence ID: [CP049781.1](#) Length: 1649642 Number of Matches: 4

Range 1: 9272 to 10278 [GenBank](#) [Graphics](#) [Next Match](#) [Previous Match](#)

| Score           | Expect                                                        | Identities      | Gaps       | Strand    |
|-----------------|---------------------------------------------------------------|-----------------|------------|-----------|
| 1860 bits(1007) | 0.0                                                           | 1007/1007(100%) | 0/1007(0%) | Plus/Plus |
| Query 1         | TGGGGAATATTGCACAATGGGCGAAAGCCTGATGCAGCGACGCCGCGTGAGCGAAGAAGT  | 60              |            |           |
| Sbjct 9272      | TGGGGAATATTGCACAATGGGCGAAAGCCTGATGCAGCGACGCCGCGTGAGCGAAGAAGT  | 9331            |            |           |
| Query 61        | ATTTCCGGTATGTAAAGCTCTATCAGAAGGGAAGAAAATGACGGTACCTTACTAAGAAGCT | 120             |            |           |
| Sbjct 9332      | ATTTCCGGTATGTAAAGCTCTATCAGAAGGGAAGAAAATGACGGTACCTTACTAAGAAGCT | 9391            |            |           |
| Query 121       | CCGGCTAAATACGTGCCAGCAGCCGCGGTAATACGTATGGAGCAAGCGTTATCCGGATTT  | 180             |            |           |
| Sbjct 9392      | CCGGCTAAATACGTGCCAGCAGCCGCGGTAATACGTATGGAGCAAGCGTTATCCGGATTT  | 9451            |            |           |
| Query 181       | ACTGGGTGTAAAGGGAGTGTAGGCGGCACTATAAGTCTGATGTGAAAACCTAAGGCTTAA  | 240             |            |           |
| Sbjct 9452      | ACTGGGTGTAAAGGGAGTGTAGGCGGCACTATAAGTCTGATGTGAAAACCTAAGGCTTAA  | 9511            |            |           |
| Query 241       | CCATAGGATTGCATTGGAAACTGTAGAGCTGGAGTATCGGAGAGGCAAGCGGAATTCCTG  | 300             |            |           |
| Sbjct 9512      | CCATAGGATTGCATTGGAAACTGTAGAGCTGGAGTATCGGAGAGGCAAGCGGAATTCCTG  | 9571            |            |           |
| Query 301       | GTGTAGTGGTGAATACGTAGATATCAGGAAGAACATCGGTGGCGAAGGCGGCTTGCTGG   | 360             |            |           |
| Sbjct 9572      | GTGTAGTGGTGAATACGTAGATATCAGGAAGAACATCGGTGGCGAAGGCGGCTTGCTGG   | 9631            |            |           |
| Query 361       | ACGATAACTGACGCTAAGGCTCGAAAGCGTGGGAAGCGAACAGGATTAGATACCCTGGTA  | 420             |            |           |
| Sbjct 9632      | ACGATAACTGACGCTAAGGCTCGAAAGCGTGGGAAGCGAACAGGATTAGATACCCTGGTA  | 9691            |            |           |
| Query 421       | GTCCACGCTGTAAACGATGAACACTAGGTGTTGGGAGGCTAAGCCTTTTCAGTGCCGCAGC | 480             |            |           |
| Sbjct 9692      | GTCCACGCTGTAAACGATGAACACTAGGTGTTGGGAGGCTAAGCCTTTTCAGTGCCGCAGC | 9751            |            |           |
| Query 481       | AAACGCAATAAGTGTTCCACCTGGGGAGTACGTTTCGCAAGAATGAAACTCAAAGGAATTG | 540             |            |           |
| Sbjct 9752      | AAACGCAATAAGTGTTCCACCTGGGGAGTACGTTTCGCAAGAATGAAACTCAAAGGAATTG | 9811            |            |           |
| Query 541       | ACGGGGACCCGCACAAGCGGTGGAGCATGTGGTTTAATTCGAAGCAACGCGAAGAACCTT  | 600             |            |           |

Supplemental file 1.2: BLAST alignment analysis of BVAB-1

**Description** BVAB-2\_AY724740.1 Uncultured bacterium clone 123-f 23 ...  
**Molecule type** dna  
**Query Length** 1009  
**Other reports** [Distance tree of results](#) [MSA viewer](#) [?](#)

**Percent Identity**  to   
**E value**  to   
**Query Coverage**  to

**Descriptions** | [Graphic Summary](#) | [Alignments](#) | [Taxonomy](#)

**Sequences producing significant alignments** Download  Select columns  Show  [?](#)

select all 100 sequences selected

[GenBank](#) | [Graphics](#) | [Distance tree of results](#) | [MSA Viewer](#)

|                                     | Description                                                                                                | Scientific Name                     | Max Score | Total Score | Query Cover | E value | Per. Ident | Acc. Len | Accession                  |
|-------------------------------------|------------------------------------------------------------------------------------------------------------|-------------------------------------|-----------|-------------|-------------|---------|------------|----------|----------------------------|
| <input checked="" type="checkbox"/> | <a href="#">Uncultured bacterium clone ncd989g05c1 16S ribosomal RNA gene, partial sequence</a>            | <a href="#">uncultured bacte...</a> | 1864      | 1864        | 100%        | 0.0     | 100.00%    | 1358     | <a href="#">HM334697.1</a> |
| <input checked="" type="checkbox"/> | <a href="#">Uncultured bacterium clone ncd997d08c1 16S ribosomal RNA gene, partial sequence</a>            | <a href="#">uncultured bacte...</a> | 1864      | 1864        | 100%        | 0.0     | 100.00%    | 1358     | <a href="#">HM332642.1</a> |
| <input checked="" type="checkbox"/> | <a href="#">Uncultured bacterium clone 123-f 23 16S ribosomal RNA gene, partial sequence</a>               | <a href="#">uncultured bacte...</a> | 1864      | 1864        | 100%        | 0.0     | 100.00%    | 1009     | <a href="#">AY724740.1</a> |
| <input checked="" type="checkbox"/> | <a href="#">Uncultured bacterium clone rRNA115 16S ribosomal RNA gene, partial sequence</a>                | <a href="#">uncultured bacte...</a> | 1864      | 1864        | 100%        | 0.0     | 100.00%    | 1513     | <a href="#">AY958888.1</a> |
| <input checked="" type="checkbox"/> | <a href="#">Oscillospiraceae bacterium strain CHIC02 1186E3-8 16S ribosomal RNA gene, partial sequence</a> | <a href="#">Oscillospiraceae...</a> | 1858      | 1858        | 100%        | 0.0     | 99.90%     | 1450     | <a href="#">OP540273.1</a> |
| <input checked="" type="checkbox"/> | <a href="#">Uncultured bacterium clone ncd1058g03c1 16S ribosomal RNA gene, partial sequence</a>           | <a href="#">uncultured bacte...</a> | 1858      | 1858        | 100%        | 0.0     | 99.90%     | 1358     | <a href="#">HM344558.1</a> |
| <input checked="" type="checkbox"/> | <a href="#">Uncultured bacterium clone ncd1008g01c1 16S ribosomal RNA gene, partial sequence</a>           | <a href="#">uncultured bacte...</a> | 1858      | 1858        | 100%        | 0.0     | 99.90%     | 1358     | <a href="#">HM341223.1</a> |
| <input checked="" type="checkbox"/> | <a href="#">Uncultured bacterium clone ncd988h05c1 16S ribosomal RNA gene, partial sequence</a>            | <a href="#">uncultured bacte...</a> | 1858      | 1858        | 100%        | 0.0     | 99.90%     | 1358     | <a href="#">HM334584.1</a> |
| <input checked="" type="checkbox"/> | <a href="#">Uncultured bacterium clone rRNA164 16S ribosomal RNA gene, partial sequence</a>                | <a href="#">uncultured bacte...</a> | 1858      | 1858        | 100%        | 0.0     | 99.90%     | 1514     | <a href="#">AY958937.1</a> |
| <input checked="" type="checkbox"/> | <a href="#">Oscillospiraceae bacterium strain UPII 610-J 16S ribosomal RNA gene, partial sequence</a>      | <a href="#">Oscillospiraceae...</a> | 1855      | 1855        | 100%        | 0.0     | 99.80%     | 1455     | <a href="#">OP540270.1</a> |
| <input checked="" type="checkbox"/> | <a href="#">Uncultured bacterium clone ncd1060a10c1 16S ribosomal RNA gene, partial sequence</a>           | <a href="#">uncultured bacte...</a> | 1853      | 1853        | 100%        | 0.0     | 99.80%     | 1358     | <a href="#">HM344624.1</a> |
| <input checked="" type="checkbox"/> | <a href="#">Uncultured bacterium clone ncd1005h09c1 16S ribosomal RNA gene, partial sequence</a>           | <a href="#">uncultured bacte...</a> | 1853      | 1853        | 100%        | 0.0     | 99.80%     | 1358     | <a href="#">HM341026.1</a> |
| <input checked="" type="checkbox"/> | <a href="#">Uncultured bacterium clone ncd998a04c1 16S ribosomal RNA gene, partial sequence</a>            | <a href="#">uncultured bacte...</a> | 1853      | 1853        | 100%        | 0.0     | 99.80%     | 1358     | <a href="#">HM332641.1</a> |
| <input checked="" type="checkbox"/> | <a href="#">Uncultured bacterium partial 16S rRNA gene, isolate BF0002B065</a>                             | <a href="#">uncultured bacte...</a> | 1853      | 1853        | 100%        | 0.0     | 99.80%     | 1490     | <a href="#">AM697115.1</a> |
| <input checked="" type="checkbox"/> | <a href="#">Uncultured bacterium clone nck198e03c1 16S ribosomal RNA gene, partial sequence</a>            | <a href="#">uncultured bacte...</a> | 1847      | 1847        | 100%        | 0.0     | 99.70%     | 1358     | <a href="#">KF094825.1</a> |
| <input checked="" type="checkbox"/> | <a href="#">Uncultured bacterium clone ncd1057f07c1 16S ribosomal RNA gene, partial sequence</a>           | <a href="#">uncultured bacte...</a> | 1847      | 1847        | 100%        | 0.0     | 99.70%     | 1358     | <a href="#">HM340507.1</a> |
| <input checked="" type="checkbox"/> | <a href="#">Uncultured bacterium clone rRNA351 16S ribosomal RNA gene, partial sequence</a>                | <a href="#">uncultured bacte...</a> | 1847      | 1847        | 100%        | 0.0     | 99.70%     | 1510     | <a href="#">AY959124.1</a> |
| <input checked="" type="checkbox"/> | <a href="#">Uncultured bacterium clone ncd1008a01c1 16S ribosomal RNA gene, partial sequence</a>           | <a href="#">uncultured bacte...</a> | 1845      | 1845        | 100%        | 0.0     | 99.70%     | 1357     | <a href="#">HM341161.1</a> |

**Supplemental file 1.3: BLAST alignment analysis of BVAB-2**

# Oscillospiraceae bacterium strain CHIC02 1186E3-8 16S ribosomal RNA gene, partial sequence

Sequence ID: [OP540273.1](#) Length: 1450 Number of Matches: 1

Range 1: 358 to 1366 [GenBank](#) [Graphics](#)

[▼ Next Match](#) [▲ Previous Match](#)

| Score           | Expect | Identities                                                     | Gaps       | Strand    |
|-----------------|--------|----------------------------------------------------------------|------------|-----------|
| 1858 bits(1006) | 0.0    | 1008/1009(99%)                                                 | 0/1009(0%) | Plus/Plus |
| Query 1         |        | TGGGGAATATTGGGCAATGGGCGAAAGCCTGACCCAGCAACGCCGCGTGAGTGATGAAGG   |            | 60        |
| Sbjct 358       |        | TGGGGAATATTGGGCAATGGGCGAAAGCCTGACCCAGCAACGCCGCGTGAGTGATGAAGG   |            | 417       |
| Query 61        |        | CCTTCGGGTTGTAAAACCTTTTGGACAGGGACGAAGAAAGTGACGGTACCTGTAGAACAA   |            | 120       |
| Sbjct 418       |        | CCTTCGGGTTGTAAAACCTTTTGGACAGGGACGAAGAAAGTGACGGTACCTGTAGAACAA   |            | 477       |
| Query 121       |        | GCCACGGCTAACTACGTGCCAGCAGCCGCGGTAATACGTAGGTGGCGAGCGTTATCCGGA   |            | 180       |
| Sbjct 478       |        | GCCACGGCTAACTACGTGCCAGCAGCCGCGGTAATACGTAGGTGGCGAGCGTTATCCGGA   |            | 537       |
| Query 181       |        | TTTACTGGGCGTAAAGGGCGGTAGGCGGCTAGATAAGTGTGATGTTTTAAATCCAAGGCT   |            | 240       |
| Sbjct 538       |        | TTTACTGGGCGTAAAGGGCGGTAGGCGGCTAGATAAGTGTGATGTTTTAAATCCAAGGCT   |            | 597       |
| Query 241       |        | TAACCTTGGGGTTCATTACAAACTGTTTAGCTTGAGTGCTGGAGAGGATAGTGGAATTCC   |            | 300       |
| Sbjct 598       |        | TAACCTTGGGGTTCATTACAAACTGTTTAGCTTGAGTGCTGGAGAGGATAGTGGAATTCC   |            | 657       |
| Query 301       |        | TAGTGTAGCGGTAAAATGCGTAGATATTAGGAGGAACACCGGTGGCGAAGGCGGCTATCT   |            | 360       |
| Sbjct 658       |        | TAGTGTAGCGGTAAAATGCGTAGATATTAGGAGGAACACCGGTGGCGAAGGCGGCTATCT   |            | 717       |
| Query 361       |        | GGACAGTAACTGACGCTGAGGCGCGAAAGCGTGGGGAGCAAACAGGATTAGATACCCTGG   |            | 420       |
| Sbjct 718       |        | GGACAGTAACTGACGCTGAGGCGCGAAAGCGTGGGGAGCAAACAGGATTAGATACCCTGG   |            | 777       |
| Query 421       |        | TAGTCCACGCCGTAAACGATGAATACTAGCTGTAGGAGGTATCGACCCCTTCTGTGGCGC   |            | 480       |
| Sbjct 778       |        | TAGTCCACGCCGTAAACGATGAATACTAGCTGTAGGAGGTATCGACCCCTTCTGTGGCGC   |            | 837       |
| Query 481       |        | AGTTAACACAATAAGTATTCCGCCCTGGGGAGTACGGCCGCAAGGTTAAAACCTCAAAGGAA |            | 540       |
| Sbjct 838       |        | AGTTAACACAATAAGTATTCCGCCCTGGGGAGTACGGCCGCAAGGTTAAAACCTCAAAGGAA |            | 897       |
| Query 541       |        | TTGACGGGGACCCGCACAAGCAGTGGATTATGTGGTTTAAATTCGAAGCAACGCGAAGAAC  |            | 600       |
| Sbjct 898       |        | TTGACGGGGACCCGCACAAGCAGTGGATTATGTGGTTTAAATTCGAAGCAACGCGAAGAAC  |            | 957       |
| Query 601       |        | CTTACCAGGACTTGACATCCTCTGACGATTTCAGGAGACTGAATTTTCTCTTCGGAGACAG  |            | 660       |
| Sbjct 958       |        | CTTACCAGGACTTGACATCCTCTGACGATTTCAGGAGACTGAATTTTCTCTTCGGAGACAG  |            | 1017      |
| Query 661       |        | AGAGACAGGTGGTGCATGGTTGTCGTCAGCTCGTGTGCGTGAGATGTTGGGTTAAGTCCCC  |            | 720       |

Supplemental file 1.4: BLAST alignment analysis of BVAB-2.

## Sequences producing significant alignments

Download

Select columns

Show 100

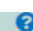 select all 100 sequences selected[GenBank](#)[Graphics](#)[Distance tree of results](#)[MSA Viewer](#)

|                                     | Description                                                                                      | Scientific Name                             | Max Score | Total Score | Query Cover | E value | Per. Ident | Acc. Len | Accession                   |
|-------------------------------------|--------------------------------------------------------------------------------------------------|---------------------------------------------|-----------|-------------|-------------|---------|------------|----------|-----------------------------|
| <input checked="" type="checkbox"/> | <a href="#">Clostridiales genomosp. BVAB3 16S ribosomal RNA gene, partial sequence</a>           | <a href="#">Mageeibacillus indolicus</a>    | 1866      | 1866        | 100%        | 0.0     | 100.00%    | 1382     | <a href="#">KC311734.1</a>  |
| <input checked="" type="checkbox"/> | <a href="#">Bacterium BVAB3-Strain 4 16S ribosomal RNA gene, partial sequence</a>                | <a href="#">bacterium BVAB3-Strain 4</a>    | 1866      | 1866        | 100%        | 0.0     | 100.00%    | 1480     | <a href="#">GQ900634.1</a>  |
| <input checked="" type="checkbox"/> | <a href="#">Mageeibacillus indolicus strain 0009-5 16S ribosomal RNA, partial sequence</a>       | <a href="#">Mageeibacillus indolicus</a>    | 1866      | 1866        | 100%        | 0.0     | 100.00%    | 1480     | <a href="#">NR_146698.1</a> |
| <input checked="" type="checkbox"/> | <a href="#">Uncultured bacterium clone 1123b-58-f 16S ribosomal RNA gene, partial sequence</a>   | <a href="#">uncultured bacterium</a>        | 1866      | 1866        | 100%        | 0.0     | 100.00%    | 1503     | <a href="#">GQ900629.1</a>  |
| <input checked="" type="checkbox"/> | <a href="#">Mageeibacillus indolicus UPII9-5 chromosome, complete genome</a>                     | <a href="#">Mageeibacillus indolicus...</a> | 1866      | 3732        | 100%        | 0.0     | 100.00%    | 1809746  | <a href="#">CP001850.2</a>  |
| <input checked="" type="checkbox"/> | <a href="#">Uncultured bacterium clone nbw1012c09c1 16S ribosomal RNA gene, partial sequence</a> | <a href="#">uncultured bacterium</a>        | 1866      | 1866        | 100%        | 0.0     | 100.00%    | 1349     | <a href="#">GQ043025.1</a>  |
| <input checked="" type="checkbox"/> | <a href="#">Uncultured bacterium clone 123f 17 16S ribosomal RNA gene, partial sequence</a>      | <a href="#">uncultured bacterium</a>        | 1866      | 1866        | 100%        | 0.0     | 100.00%    | 1010     | <a href="#">AY724741.1</a>  |
| <input checked="" type="checkbox"/> | <a href="#">Mageeibacillus indolicus strain 0019-D 16S ribosomal RNA gene, partial sequence</a>  | <a href="#">Mageeibacillus indolicus</a>    | 1862      | 1862        | 100%        | 0.0     | 99.90%     | 1480     | <a href="#">GQ900633.1</a>  |
| <input checked="" type="checkbox"/> | <a href="#">Mageeibacillus indolicus strain 0004-9 16S ribosomal RNA gene, partial sequence</a>  | <a href="#">Mageeibacillus indolicus</a>    | 1862      | 1862        | 100%        | 0.0     | 99.90%     | 1480     | <a href="#">GQ900631.1</a>  |
| <input checked="" type="checkbox"/> | <a href="#">Uncultured bacterium clone 8.001-2 16S ribosomal RNA gene, partial sequence</a>      | <a href="#">uncultured bacterium</a>        | 1860      | 1860        | 100%        | 0.0     | 99.90%     | 1297     | <a href="#">JX871279.1</a>  |
| <input checked="" type="checkbox"/> | <a href="#">Uncultured bacterium clone nbu407b07c1 16S ribosomal RNA gene, partial sequence</a>  | <a href="#">uncultured bacterium</a>        | 1855      | 1855        | 100%        | 0.0     | 99.80%     | 1349     | <a href="#">GQ038494.1</a>  |
| <input checked="" type="checkbox"/> | <a href="#">Uncultured bacterium clone FX93B4-11 16S ribosomal RNA gene, partial sequence</a>    | <a href="#">uncultured bacterium</a>        | 1820      | 1820        | 98%         | 0.0     | 99.80%     | 1323     | <a href="#">AY995273.1</a>  |
| <input checked="" type="checkbox"/> | <a href="#">Uncultured bacterium clone WDoral5F08 16S ribosomal RNA gene, partial sequence</a>   | <a href="#">uncultured bacterium</a>        | 1666      | 1666        | 100%        | 0.0     | 96.44%     | 1350     | <a href="#">KC259695.1</a>  |
| <input checked="" type="checkbox"/> | <a href="#">Uncultured bacterium clone 112Q-85 16S ribosomal RNA gene, partial sequence</a>      | <a href="#">uncultured bacterium</a>        | 1663      | 1663        | 89%         | 0.0     | 100.00%    | 900      | <a href="#">GQ900636.1</a>  |
| <input checked="" type="checkbox"/> | <a href="#">Uncultured bacterium clone 2BV-25 16S ribosomal RNA gene, partial sequence</a>       | <a href="#">uncultured bacterium</a>        | 1663      | 1663        | 89%         | 0.0     | 100.00%    | 900      | <a href="#">EU188978.1</a>  |
| <input checked="" type="checkbox"/> | <a href="#">Uncultured bacterium clone WD9oral2D09 16S ribosomal RNA gene, partial sequence</a>  | <a href="#">uncultured bacterium</a>        | 1661      | 1661        | 100%        | 0.0     | 96.34%     | 1350     | <a href="#">KC260938.1</a>  |
| <input checked="" type="checkbox"/> | <a href="#">Uncultured bacterium clone WD9oral2A05 16S ribosomal RNA gene, partial sequence</a>  | <a href="#">uncultured bacterium</a>        | 1661      | 1661        | 100%        | 0.0     | 96.34%     | 1350     | <a href="#">KC260907.1</a>  |
| <input checked="" type="checkbox"/> | <a href="#">Uncultured bacterium clone WD2oralAB03 16S ribosomal RNA gene, partial sequence</a>  | <a href="#">uncultured bacterium</a>        | 1661      | 1661        | 100%        | 0.0     | 96.34%     | 1350     | <a href="#">KC260805.1</a>  |
| <input checked="" type="checkbox"/> | <a href="#">Uncultured bacterium clone WD9oralEH06 16S ribosomal RNA gene, partial sequence</a>  | <a href="#">uncultured bacterium</a>        | 1661      | 1661        | 100%        | 0.0     | 96.34%     | 1350     | <a href="#">KC260441.1</a>  |
| <input checked="" type="checkbox"/> | <a href="#">Uncultured bacterium clone WD1oralAH04 16S ribosomal RNA gene, partial sequence</a>  | <a href="#">uncultured bacterium</a>        | 1661      | 1661        | 100%        | 0.0     | 96.34%     | 1351     | <a href="#">KC260194.1</a>  |
| <input checked="" type="checkbox"/> | <a href="#">Uncultured bacterium clone WDoral5G03 16S ribosomal RNA gene, partial sequence</a>   | <a href="#">uncultured bacterium</a>        | 1661      | 1661        | 100%        | 0.0     | 96.34%     | 1351     | <a href="#">KC259699.1</a>  |
| <input checked="" type="checkbox"/> | <a href="#">Uncultured bacterium clone WDoral3G06 16S ribosomal RNA gene, partial sequence</a>   | <a href="#">uncultured bacterium</a>        | 1661      | 1661        | 100%        | 0.0     | 96.34%     | 1350     | <a href="#">KC259558.1</a>  |
| <input checked="" type="checkbox"/> | <a href="#">Uncultured bacterium clone WD9oral2A07 16S ribosomal RNA gene, partial sequence</a>  | <a href="#">uncultured bacterium</a>        | 1655      | 1655        | 100%        | 0.0     | 96.24%     | 1350     | <a href="#">KC260908.1</a>  |
| <input checked="" type="checkbox"/> | <a href="#">Uncultured bacterium clone WD2oralBG02 16S ribosomal RNA gene, partial sequence</a>  | <a href="#">uncultured bacterium</a>        | 1655      | 1655        | 100%        | 0.0     | 96.24%     | 1350     | <a href="#">KC260241.1</a>  |
| <input checked="" type="checkbox"/> | <a href="#">Uncultured bacterium clone WD1oralAD01 16S ribosomal RNA gene, partial sequence</a>  | <a href="#">uncultured bacterium</a>        | 1655      | 1655        | 100%        | 0.0     | 96.24%     | 1350     | <a href="#">KC260162.1</a>  |

**Supplemental file 1.5: BLAST alignment analysis of BVAB-3**

### Mageeibacillus indolicus UPII9-5 chromosome, complete genome

Sequence ID: [CP001850.2](#) Length: 1809746 Number of Matches: 2

Range 1: 255893 to 256902 [GenBank](#) [Graphics](#) [Next Match](#) [Previous Match](#)

| Score           | Expect | Identities                                                      | Gaps       | Strand    |
|-----------------|--------|-----------------------------------------------------------------|------------|-----------|
| 1866 bits(1010) | 0.0    | 1010/1010(100%)                                                 | 0/1010(0%) | Plus/Plus |
| Query 1         |        | TGGGGAATATTGGGCAATGGGGCGAAAGCCTGACCCAGCAACGCCGCGTGAAGTATGAAGG   |            | 60        |
| Sbjct 255893    |        | TGGGGAATATTGGGCAATGGGGCGAAAGCCTGACCCAGCAACGCCGCGTGAAGTATGAAGG   |            | 255952    |
| Query 61        |        | CCTTCGGGTTGTAAACTTCTTTGATCAGGGAAGAAACAAATGACGGTACCTGAAAAACAA    |            | 120       |
| Sbjct 255953    |        | CCTTCGGGTTGTAAACTTCTTTGATCAGGGAAGAAACAAATGACGGTACCTGAAAAACAA    |            | 256012    |
| Query 121       |        | GCCACGGCTAACTACGTGCCAGCAGCCGCGGTAATACGTAGGTGGCGAGCGTTATCCGGA    |            | 180       |
| Sbjct 256013    |        | GCCACGGCTAACTACGTGCCAGCAGCCGCGGTAATACGTAGGTGGCGAGCGTTATCCGGA    |            | 256072    |
| Query 181       |        | TTTACTGGGTGTAAAGGGCGTGCAGGCGGGCTGATAAGTCAGATGTGAAATCCCCGAGCT    |            | 240       |
| Sbjct 256073    |        | TTTACTGGGTGTAAAGGGCGTGCAGGCGGGCTGATAAGTCAGATGTGAAATCCCCGAGCT    |            | 256132    |
| Query 241       |        | TAACTCGGGAAC TGCATCTGATACTGTTGGTCTTGAGTGCTGGAGAGGATAGTGGAATTC   |            | 300       |
| Sbjct 256133    |        | TAACTCGGGAAC TGCATCTGATACTGTTGGTCTTGAGTGCTGGAGAGGATAGTGGAATTC   |            | 256192    |
| Query 301       |        | CTAGTG TAGCGGTA AAAATGCGCAGATATTAGGAGGAACACCAGTGGCGAAGGCGGCTATC |            | 360       |
| Sbjct 256193    |        | CTAGTG TAGCGGTA AAAATGCGCAGATATTAGGAGGAACACCAGTGGCGAAGGCGGCTATC |            | 256252    |
| Query 361       |        | TGGACAGTA AACTGACGCTGAGGCGCGAAAGCGTGGGTAGCAAACAGGATTAGATACCCTG  |            | 420       |
| Sbjct 256253    |        | TGGACAGTA AACTGACGCTGAGGCGCGAAAGCGTGGGTAGCAAACAGGATTAGATACCCTG  |            | 256312    |
| Query 421       |        | GTAGTCCACGCCGTA AACGATGATTACTAGGTGTAGGAGGTATCGACCCCTTCTGTGCCG   |            | 480       |
| Sbjct 256313    |        | GTAGTCCACGCCGTA AACGATGATTACTAGGTGTAGGAGGTATCGACCCCTTCTGTGCCG   |            | 256372    |
| Query 481       |        | GAGTTAACACAATAAGTAATCCACCTGGGGAGTACGGCCGCAAGGTTGAAACTCAAAGGA    |            | 540       |
| Sbjct 256373    |        | GAGTTAACACAATAAGTAATCCACCTGGGGAGTACGGCCGCAAGGTTGAAACTCAAAGGA    |            | 256432    |
| Query 541       |        | ATTGACGGGGGCGCCGCA AAGCAGTGGAGTATGTGGTTTAAATTCGACGCAACGCGAAGAA  |            | 600       |
| Sbjct 256433    |        | ATTGACGGGGGCGCCGCA AAGCAGTGGAGTATGTGGTTTAAATTCGACGCAACGCGAAGAA  |            | 256492    |
| Query 601       |        | CCTTACCAGGGTTTGACATCCCTTGAACGATGTAGAGATACATAATTCCCTTCGGGGACA    |            | 660       |
| Sbjct 256493    |        | CCTTACCAGGGTTTGACATCCCTTGAACGATGTAGAGATACATAATTCCCTTCGGGGACA    |            | 256552    |
| Query 661       |        | AGGAGACAGGTGGTGCATGGTTGTCGTCAGCTCGTGTGTCGTGAGATGTTGGGTTAAGTCCC  |            | 720       |

Supplemental file 1.6: BLAST alignment analysis of BVAB-3
